# Supplementary material
Source: PubMed Central journal article supplement (PMC3690568)

**A****2.5 wk**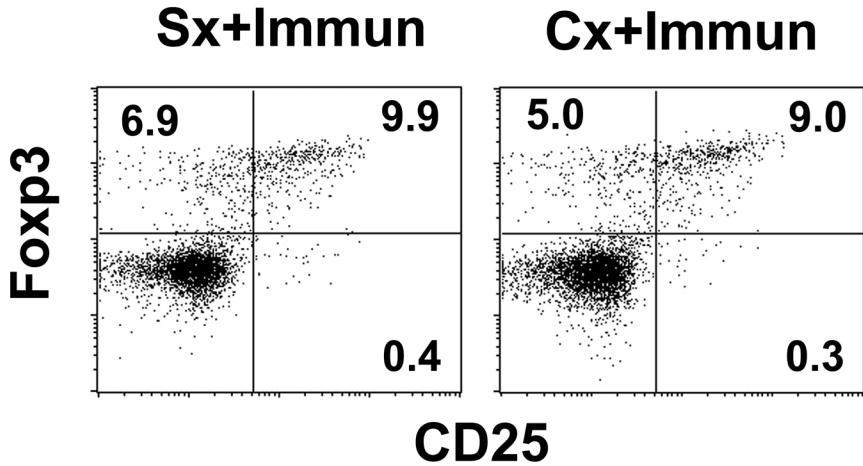**B****5 wk**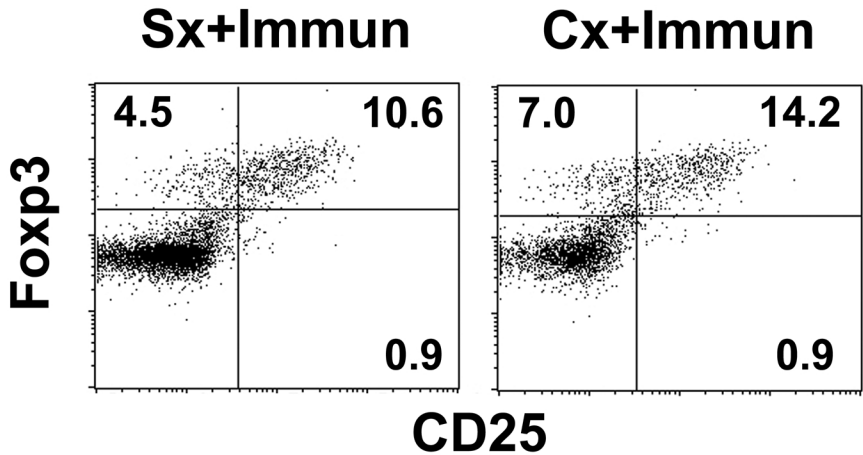

Supplement: NIHMS468121-supplement-figure_1.pdf [file NIHMS468121-supplement-figure_1.pdf]

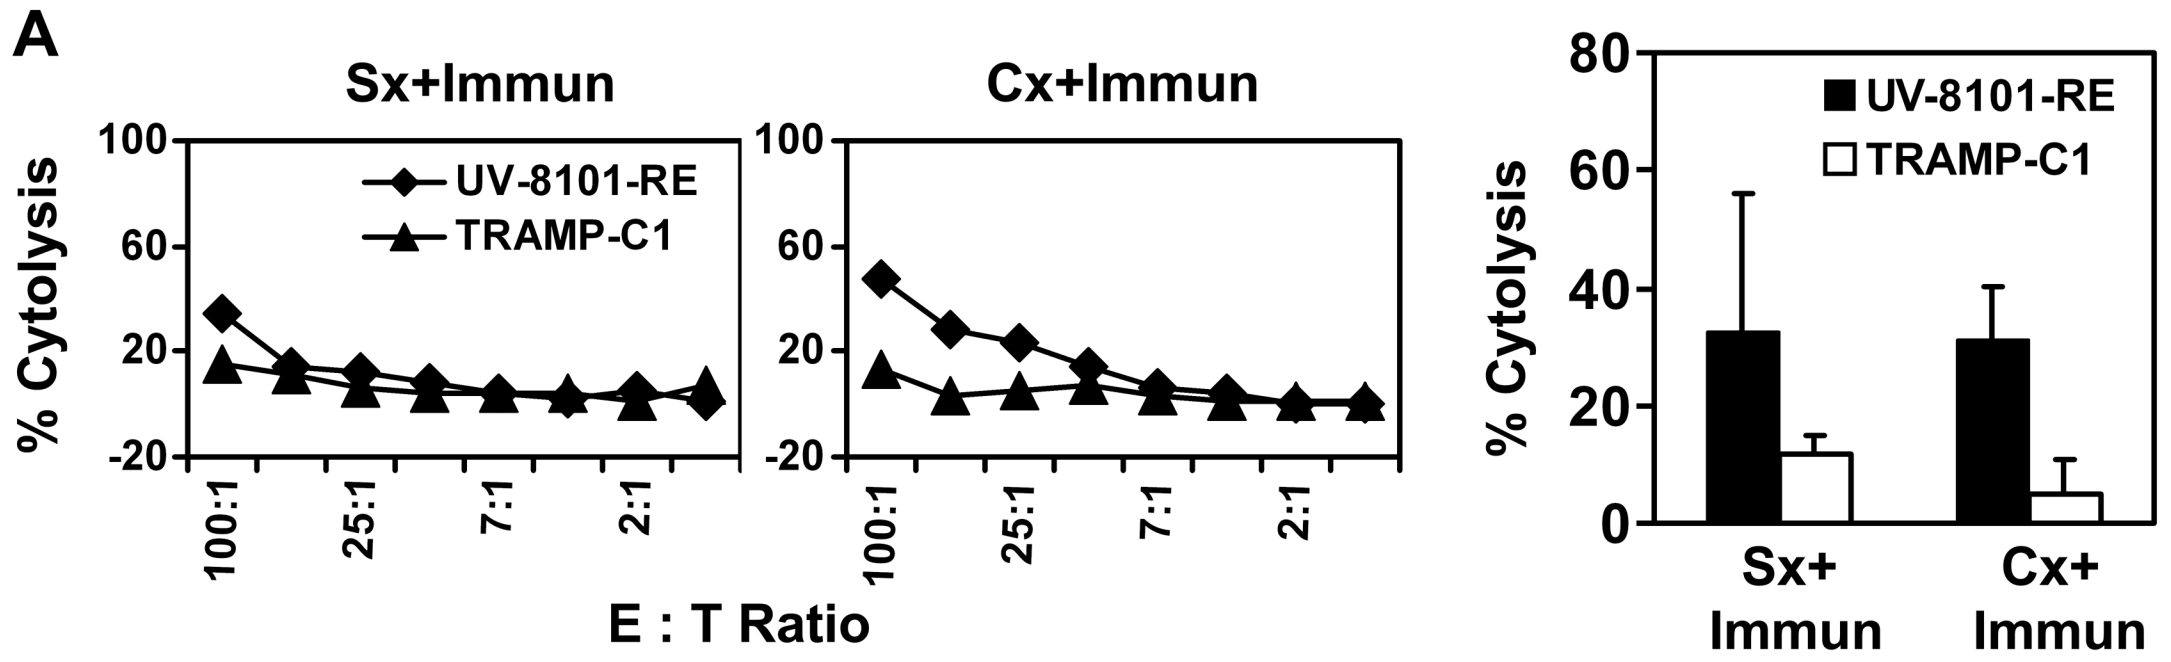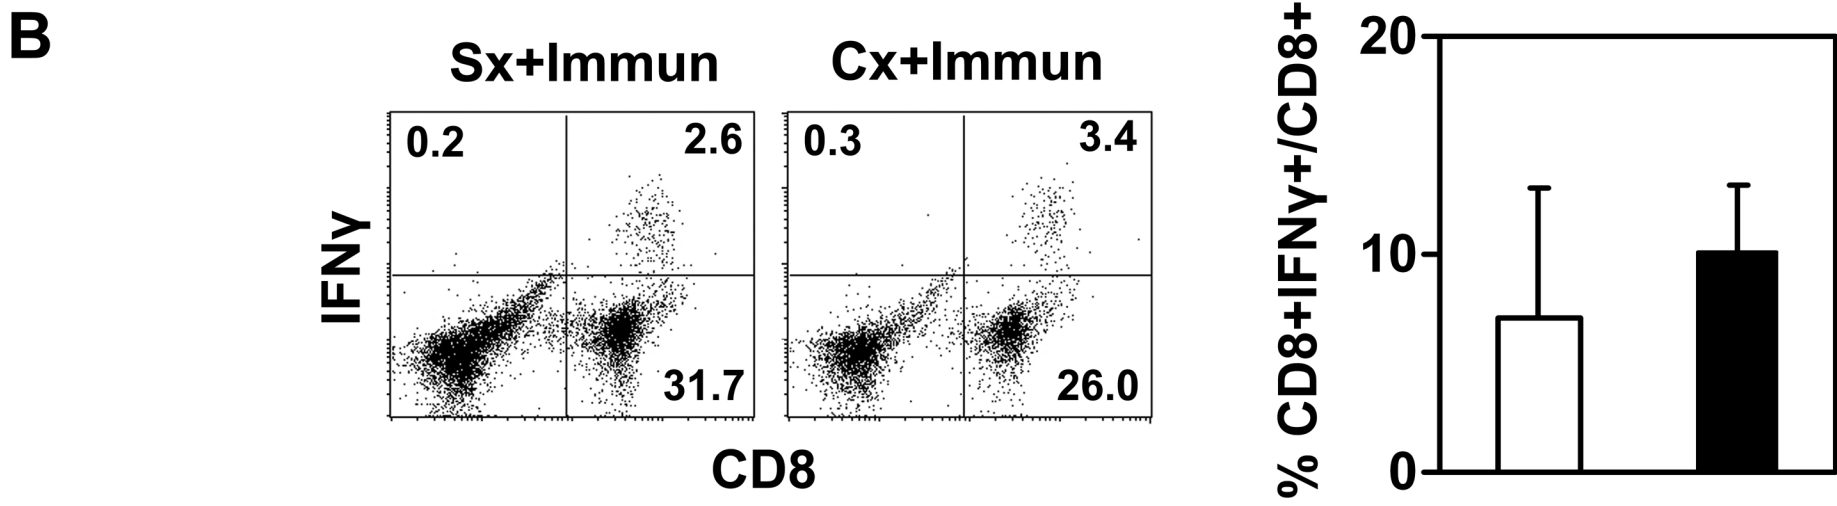

Tang et al. Figure S2

Supplement: NIHMS468121-supplement-figure_2.pdf [file NIHMS468121-supplement-figure_2.pdf]

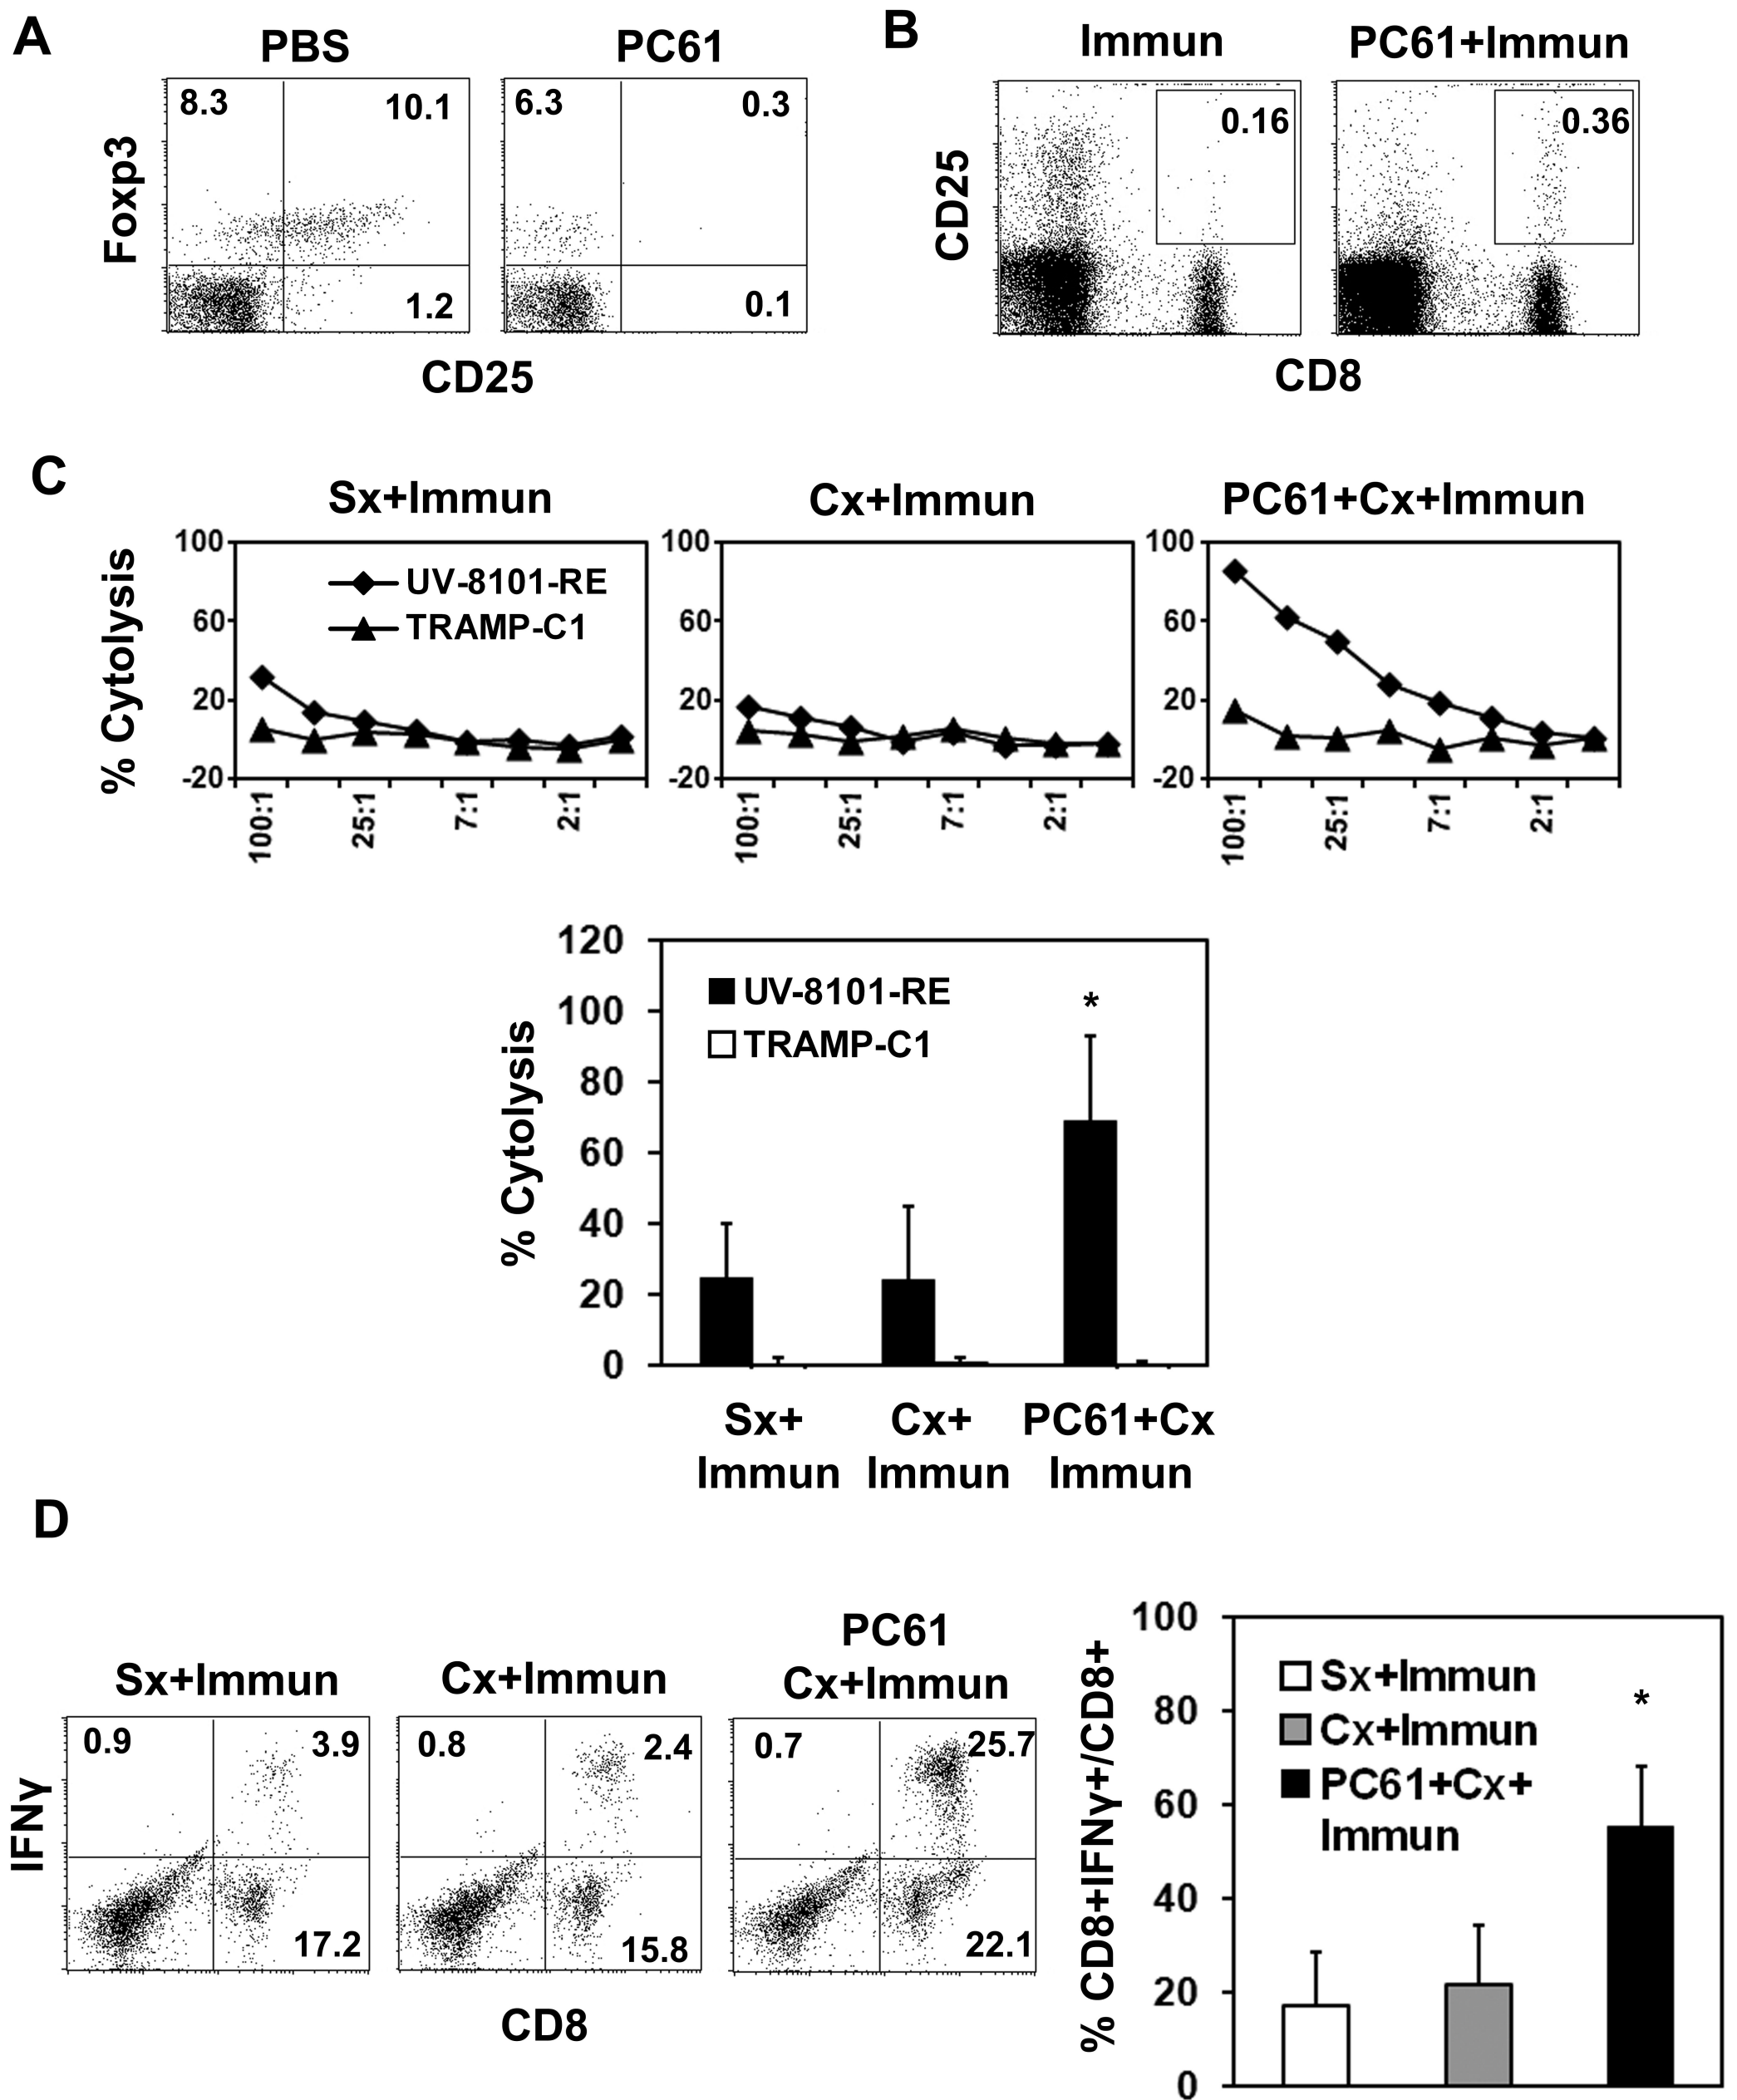

Supplement: NIHMS468121-supplement-figure_3.pdf [file NIHMS468121-supplement-figure_3.pdf]

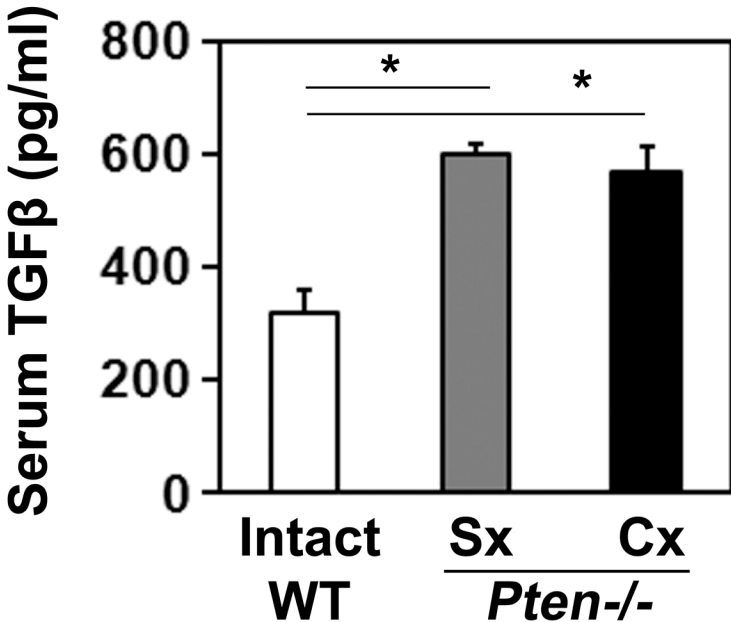

Supplement: NIHMS468121-supplement-figure_4.pdf [file NIHMS468121-supplement-figure_4.pdf]
